# Supplementary material
Source: ML conference proceedings conference paper supplement (https://proceedings.mlr.press/v84/liau18a.html)
Supplement: Supplementary file 1 [file liau18a-supp.pdf]

# Constant Space Algorithm for the Stochastic Multi-armed Bandit Problem : Supplementary File

## Appendix

### A Proof of Lemma 5.3

*Proof.* Assume the contrary, i.e. at the end of round  $r = \lceil (\frac{2}{\epsilon} + 1) \frac{\log 2/\Delta}{\log \log 2/\Delta} + 2 \rceil$ , the best arm and the second best arm are still not differentiated, meaning for some  $i \neq *$ , we still have

$$\bar{\mu}_*^{(r)} - g_r/2 < \bar{\mu}_i^{(r)} + g_r/2$$

By Lemma 5.2, we have  $g_r \leq \Delta/2$ . Thus, we have

$$\mu_* \leq \bar{\mu}_*^{(r)} + g_r/2 \leq \bar{\mu}_i^{(r)} + 3g_r/2 \leq \bar{\mu}_i^{(r)} + 3\Delta/4$$

where for the second step we use Lemma 4.3. Similarly, we have  $\mu_i \geq \bar{\mu}_i^{(r)} - \Delta/4$ . Then, we have

$$\Delta \leq \mu_* - \mu_i \leq (\bar{\mu}_i^{(r)} + 3\Delta/4) - (\bar{\mu}_i^{(r)} - \Delta/4) < \Delta$$

which results in a contradiction.  $\square$

### B Proof of Theorem 6.1

*Proof.* We present the algorithm in Algorithm 2. The algorithm repeatedly calls the procedure in Algorithm 1 with increasing time horizons  $T_0, T_1, \dots, T_L$ , where  $L \leq \log \log T$ . By setting  $T_l = T_{l-1}^2$ , we have  $T_l = T_0^{2^l}$ . Then, by Theorem 4.1, we can upper bound the regret as

$$\begin{aligned} \bar{\Psi}_T &\lesssim \sum_{l=0}^L \sum_{i=1}^K \frac{\log(\Delta_i/\Delta) \log T_l}{\Delta_i} \\ &= \sum_{l=0}^L \sum_{i=1}^K \frac{2^l \log(\Delta_i/\Delta) \log T_0}{\Delta_i} \\ &\lesssim \sum_{i=1}^K \frac{2^L \log(\Delta_i/\Delta) \log T_0}{\Delta_i} \\ &\lesssim \sum_{i=1}^K \frac{\log(\Delta_i/\Delta) \log T}{\Delta_i} \end{aligned}$$

which proves the theorem.  $\square$

### C Discussion of Conjecture on the Lower Bound for Stochastic Bandits

For any given round  $r$ , for some  $\alpha > 0$ , define:

$$R_{\text{in}}^{(r)} = \sum_{i: \Delta_i < \alpha g_r} \frac{1}{g_r}, \quad R_{\text{out}}^{(r)} = \sum_{i: \Delta_i > \alpha g_r} \frac{1}{\Delta_i}$$

That correspond to two terms in

$$\begin{aligned} \sum_{r=1}^{r_i} \Delta_i \cdot \frac{2 \log(1/\delta)}{g_r^2} + \sum_{r=r_i+1}^{r_{\max}} \Delta_i \cdot \frac{2 \log(1/\delta)}{(\Delta_i - g_{r-1})^2} \\ + \Delta_i \cdot r_{\max} \end{aligned} \quad (13)$$

which is the total regret provided within Section 5. Consider the following example where there is a group of high-value arms and a group of low-value arms, and the size of the low-value arms is larger than the high-value arms.

**Example C.1.** Assume  $1 > E \gg \epsilon$ , and  $s > 1/2$ . Let  $\Delta_i = \epsilon$  for  $i = 1 \dots sK$ , and  $\Delta_i = E$  for  $i = sK + 1 \dots K$ .

In this example, we can find that as  $g_r < E/2$ ,  $R_{\text{in}}^{(r)} = sK/g_r$ , and  $R_{\text{out}}^{(r)} = (1-s)K/E$ . Since  $g_r \lesssim E$  and  $s > 1/2$ , we can find that  $R_{\text{out}}^{(r)} \lesssim R_{\text{in}}^{(r)}$ . This means that Example C.1 will not harm us if we use Algorithm 1 because we know that  $\sum_r R_{\text{in}}^{(r)} \lesssim \sum_i 1/\Delta_i$ .

Then, we consider another example where the size of the group of the high-value arms is larger than low-value arms. Particularly, we consider

**Example C.2.** Assume  $1 > E \gg \epsilon$ , and  $s < 1/2$ , where  $s/(1-s) < \epsilon/E$ . Let  $\Delta_i = \epsilon$  for  $i = 1 \dots sK$ , and  $\Delta_i = E$  for  $i = sK + 1 \dots K$ .

We can find that in this example, as long as  $\epsilon \lesssim g_r \lesssim E$ ,  $R_{\text{in}}^{(r)} \lesssim sK/\epsilon \lesssim (1-s)/E = R_{\text{out}}^{(r)}$ . This means that this is the hard case for Algorithm 1 because  $R_{\text{out}}^{(r)}$  is dominating. However, we can deal with this example with the following update rule

$$g_{r+1} = \frac{g_r}{2 \max\{1, (1-s)/s\}}$$

which is roughly  $g_{r+1} = \frac{g_r}{2^{\max\{1, R_{\text{out}}^{(r)}/R_{\text{in}}^{(r)}\}}}$ . Note that if  $s$  is unknown, we can estimate it by simply counting the number of arms not ruled out. With the new update rule, we can find that as long as  $g_r \lesssim E$ , we have  $g_{r+1} \lesssim Es/(1-s) \lesssim \epsilon$ . This means that in the next round, we are able to identify the high-value arms. Therefore, the number of rounds is a constant.

Finally, we consider the following case where we conjectured to be the hard case:

**Example C.3.** Let  $\Delta_i = i/K$  for  $i = 1, 2, \dots, K$ .

First note that in this example,  $R_{\text{in}}^{(r)} \approx n$  and  $R_{\text{out}}^{(r)} \approx n \log 1/g_r$ , where we can find that  $R_{\text{in}}^{(r)} \lesssim R_{\text{out}}^{(r)}$  for any  $r$ . If we use the trick we are dealing with Example C.2, we can find that the corresponding update rule becomes  $g_{r+1} = \frac{g_r}{2^{\log 1/g_r}}$ . Such rule is exactly (9). Therefore, we conjecture that the additional  $\frac{\log(\Delta_i/\Delta)}{\log \log(\Delta_i/\Delta)}$  factor is not improvable.
